# Supplementary material for: Deferoxamine-Loaded Chitosan-Based Hydrogel on Bone Implants Showing Enhanced Bond Strength and Pro-Angiogenic Effects
Source: MDPI journal article supplement (doi:10.3390/jfb15040112), 2024-04-22
Supplement: s1 [file s1]

## Supplementary Material

### Deferoxamine-Loaded Chitosan-Based Hydrogel on Bone Implants Showing Enhanced Bond Strength and Pro-Angiogenic Effects

Huan Liu <sup>1</sup>, Kai Li <sup>2,3,\*</sup>, Deliang Yi <sup>2,3</sup>, Yi Ding <sup>2</sup>, Yanfeng Gao <sup>1,\*</sup>, Xuebin Zheng <sup>2,3,\*</sup>

<sup>1</sup>School of Materials Science and Engineering, Shanghai University, 99 Shangda Road, Shanghai 200444, China

<sup>2</sup>Key Laboratory of Inorganic Coating Materials CAS, Shanghai Institute of Ceramics, Chinese Academy of Sciences, 1295 Dingxi Road, Shanghai 200050, China

<sup>3</sup>Center of Materials Science and Optoelectronics Engineering, University of Chinese Academy of Sciences, 19 Yuquan Road, Beijing 100049, China

**Corresponding authors:** likai@mail.sic.ac.cn, yfgao@shu.edu.cn, xbzheng@mail.sic.ac.cn

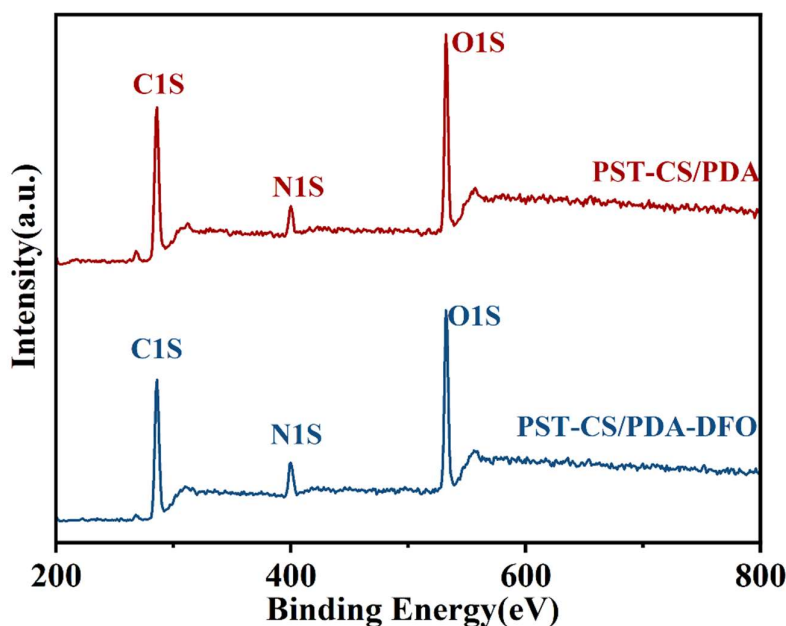

**Figure S1.** XPS wide scan C 1s, O 1s, and N 1s spectra of PST-CS/PDA and PST-CS/PDA-DFO.

Table S1. The element content of the coatings.

| Sample         | C (at. % ) | O (at. % ) | N (at. % ) |
|----------------|------------|------------|------------|
| PST-CS/PDA     | 61.14      | 29.84      | 9.03       |
| PST-CS/PDA-DFO | 59.12      | 30.58      | 10.31      |
